# Supplementary material for: Phytocannabinoids Reduce Seizures in Larval Zebrafish and Affect Endocannabinoid Gene Expression
Source: MDPI journal article supplement (doi:10.3390/biom13091398), 2023-09-16
Supplement: s1 [file s1]

## Supplementary Information

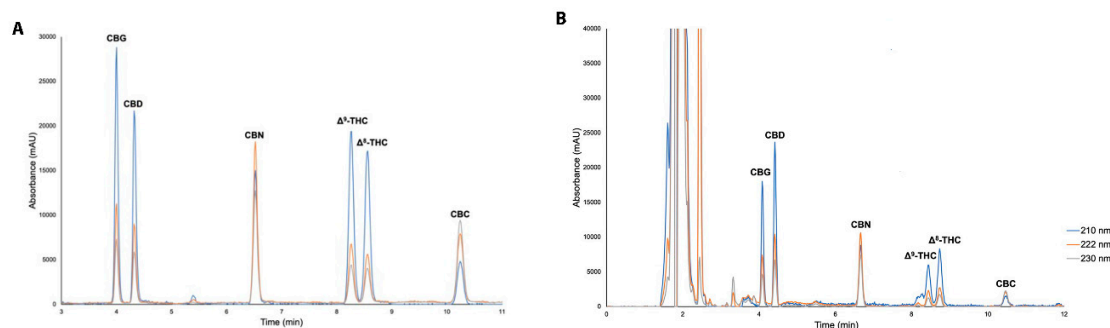

**Figure S1: Phytocannabinoid extraction chromatograms.** Representative chromatogram for a mixed standard of cannabinoids (2.5 µg/ml) in extraction solvent at three wavelengths (A). Representative chromatogram of an extraction from 12 pooled larvae treated with 6 phytocannabinoids at a concentration of 4 µM (B).

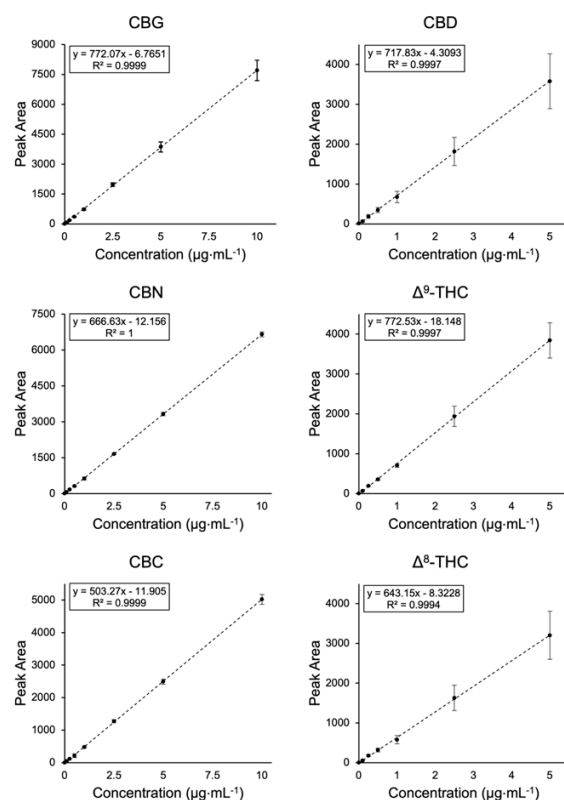

**Figure S2: External calibration curves across the linear range of each compound, presented as average of three different days.** Error bars represent the standard deviation between the

days. Linear regression analysis is plotted as dotted lines with the equation for the line of best fit and the linear correlation coefficient ( $R^2$ ) in the overlaid boxes.

**Table S1.** Cannabinoid retention times, quantification wavelengths and analytical figures of merit of the presented method. RT = retention time; Quant. WL = quantification wavelength; LLOD = lower limit of detection; LLOQ = lower limit of quantification; IDV = inter-day variability.

| Analyte         | RT (min) | Quant. WL (nm) | LLOD ( $\mu\text{g}\cdot\text{mL}^{-1}$ for 20 $\mu\text{L}$ inj.) | LLOQ ( $\mu\text{g}\cdot\text{mL}^{-1}$ for 20 $\mu\text{L}$ inj.) | LLOD ng/larva | LLOQ ng/larva | Linear range and $R^2$ , n=3 | IDV (% , n=10) |
|-----------------|----------|----------------|--------------------------------------------------------------------|--------------------------------------------------------------------|---------------|---------------|------------------------------|----------------|
| CBG             | 4.0      | 210            | 0.02                                                               | 0.07                                                               | 0.27          | 1.01          | 0.1-10<br>0.9999             | 5.6            |
| CBD             | 4.3      | 210            | 0.02                                                               | 0.08                                                               | 0.28          | 1.13          | 0.1-5<br>0.9997              | 7.7            |
| CBN             | 6.6      | 222            | 0.01                                                               | 0.05                                                               | 0.17          | 0.66          | 0.1-10<br>1.00               | 3.1            |
| $\Delta^9$ -THC | 8.3      | 210            | 0.01                                                               | 0.08                                                               | 0.12          | 1.04          | 0.1-5<br>0.9997              | 5.9            |
| $\Delta^8$ -THC | 8.6      | 210            | 0.01                                                               | 0.10                                                               | 0.17          | 1.45          | 0.1-5<br>0.9994              | 8.6            |
| CBC             | 10.3     | 230            | 0.03                                                               | 0.08                                                               | 0.35          | 1.11          | 0.1-10<br>0.9999             | 1.3            |
